# Supplementary material for: Sensitivity and specificity of self-reported psychiatric diagnoses amongst patients treated for opioid use disorder
Source: Springer Nature journal article supplement (doi:10.1186/s12888-021-03489-4), 2021-10-21
Supplement: MOESM1 [file 19781018]

## Supplementary Information

**Appendix A.** Paired contingency tables comparing results of self-reported diagnosis to Mini International Neuropsychiatric Interview diagnosis.

| Any psychiatric disorder |          | MINI Interview |          |
|--------------------------|----------|----------------|----------|
|                          |          | Positive       | Negative |
| Self-report              | Positive | 104            | 58       |
|                          | Negative | 304            | 217      |

| Any depressive disorder |          | MINI Interview |          |
|-------------------------|----------|----------------|----------|
|                         |          | Positive       | Negative |
| Self-report             | Positive | 34             | 70       |
|                         | Negative | 156            | 423      |

| Bipolar disorder |          | MINI Interview |          |
|------------------|----------|----------------|----------|
|                  |          | Positive       | Negative |
| Self-report      | Positive | 0              | 15       |
|                  | Negative | 90             | 578      |

| Any anxiety disorder |          | MINI Interview |          |
|----------------------|----------|----------------|----------|
|                      |          | Positive       | Negative |
| Self-report          | Positive | 34             | 68       |
|                      | Negative | 195            | 386      |

| Post-traumatic stress disorder |          | MINI Interview |          |
|--------------------------------|----------|----------------|----------|
|                                |          | Positive       | Negative |
| Self-report                    | Positive | 3              | 24       |
|                                | Negative | 69             | 587      |

| Obsessive compulsive disorder |          | MINI Interview |          |
|-------------------------------|----------|----------------|----------|
|                               |          | Positive       | Negative |
| Self-report                   | Positive | 0              | 4        |
|                               | Negative | 76             | 603      |

| Any psychotic disorder |          | MINI Interview |          |
|------------------------|----------|----------------|----------|
|                        |          | Positive       | Negative |
| Self-report            | Positive | 0              | 4        |
|                        | Negative | 25             | 654      |

| Any eating disorder |          | MINI Interview |          |
|---------------------|----------|----------------|----------|
|                     |          | Positive       | Negative |
| Self-report         | Positive | 0              | 1        |
|                     | Negative | 8              | 674      |
